# Supplementary material for: Spring-summer temperatures since AD 1780 reconstructed from stable oxygen isotope ratios in white spruce tree-rings from the Mackenzie Delta, northwestern Canada
Source: Springer Nature journal article supplement (doi:10.1007/s00382-013-1674-3), 2013-01-29
Supplement: 382_2013_1674_MOESM1_ESM.pdf [file 382_2013_1674_MOESM1_ESM.pdf]

Online Resources – Porter et al.

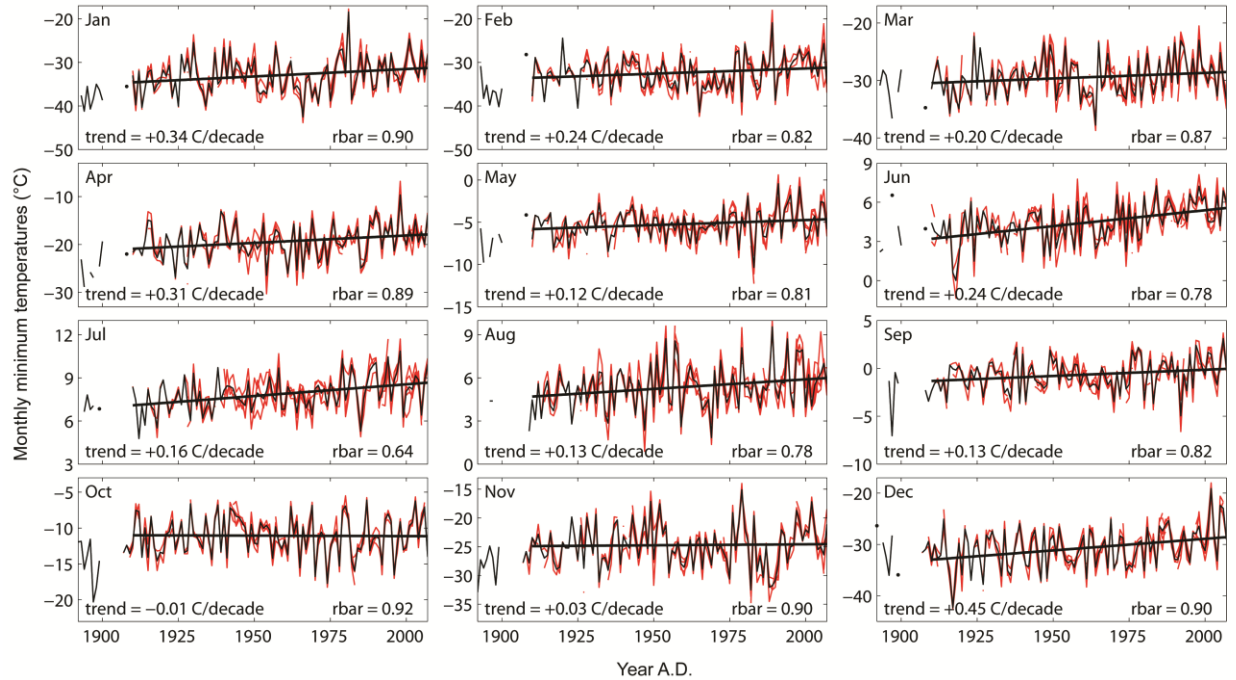

**Online Resource 1.** Comparison of monthly minimum temperatures for Tuktoyaktuk, Inuvik, Aklavik, Fort McPherson, Fort Good Hope, and Norman Wells (red); the mean and variance of all station data were adjusted to match the Inuvik record due to geographical biases; the regional averages are indicated (black). For each month, there is overlap from at least two stations from AD 1910-2008 ('trend' indicates the slope of the line over this period); mean inter-correlations (rbar) are provided, all are significant at  $p \leq 0.001$ .

Online Resources – Porter et al.

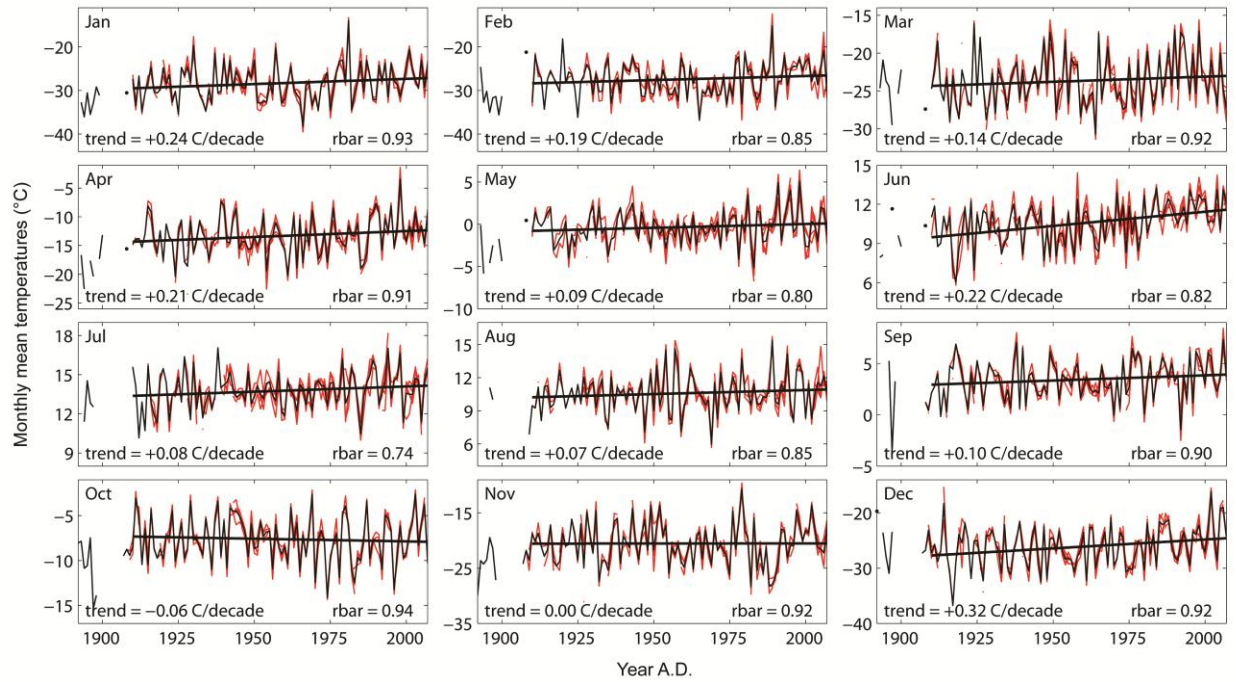

Online Resource 2. Same as Online Resource 1, but for mean temperatures.

Online Resources – Porter et al.

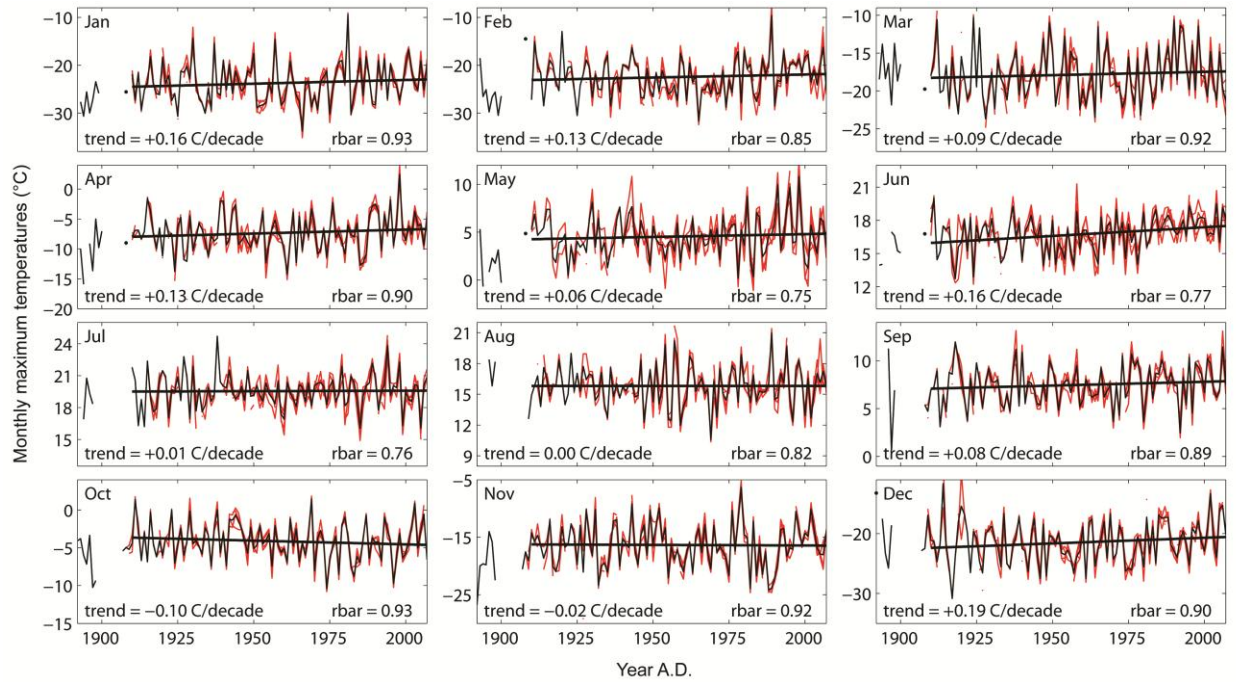

**Online Resource 3.** Same as Online Resource 1, but for maximum temperatures.

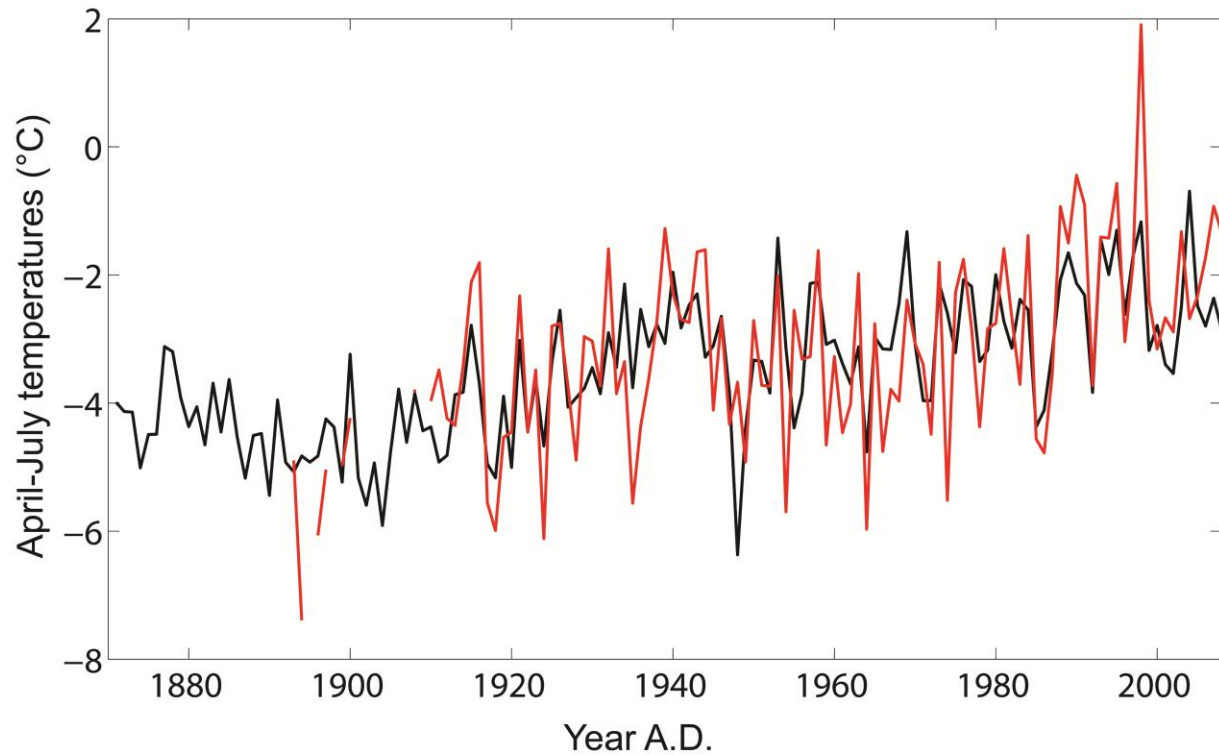

**Online Resource 4.** Comparison of local April-July minimum temperatures (red) and 20CR (20<sup>th</sup> Century V2 Reanalysis; Compo et al. 2011) April-July mean temperatures for the area 60-70°N, 130-140°W; the mean and variance of the 20CR data were adjusted to the local temperature data; the inter-correlation is 0.69 ( $p \leq 0.001$ ).

Online Resources – Porter et al.

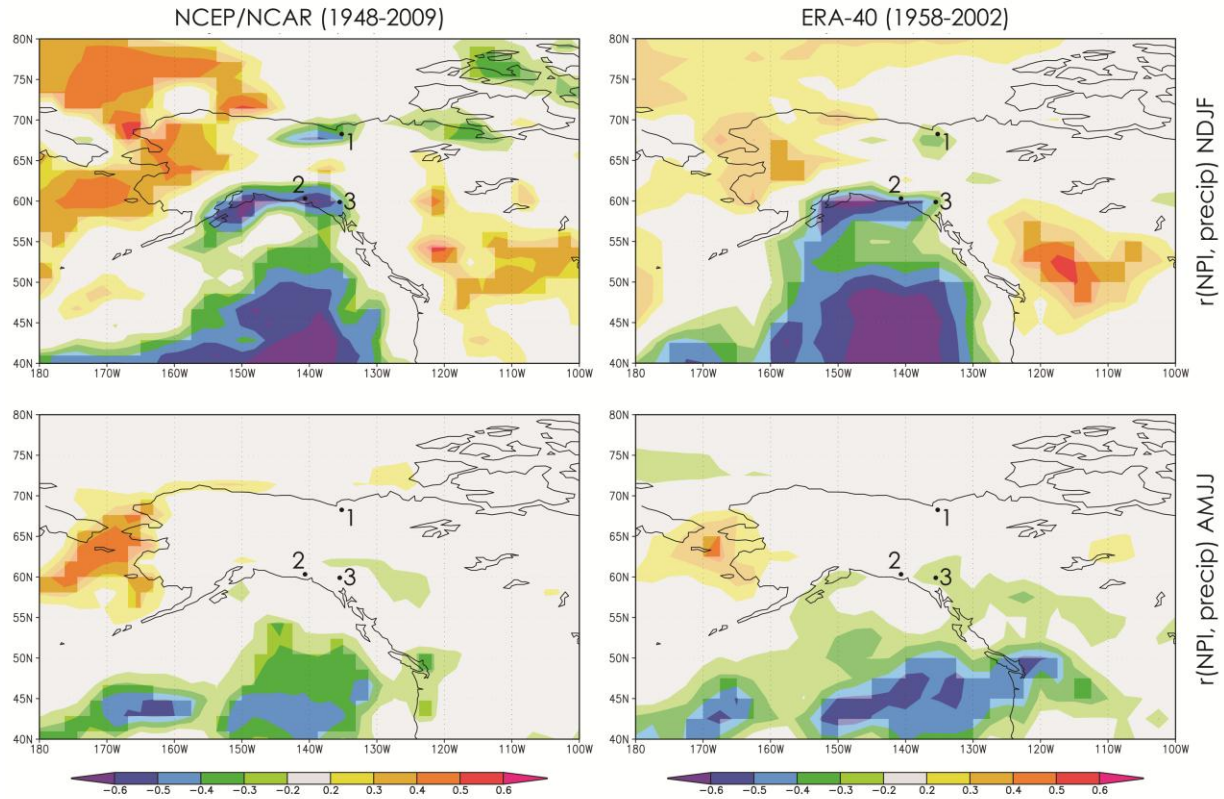

**Online Resource 5.** Correlation between NPI and the precipitation amount field for fall-winter (NDJF; top) and spring-summer (AMJJ; bottom) months. Results based on the NCEP/NCAR (Kalnay et al. 1996) and ERA-40 (Uppala et al. 2005) Reanalysis datasets are compared. Correlation maps were plotted in KNMI Climate Explorer (<http://climexp.knmi.nl>); correlations significant at  $p \leq 0.05$  (two-tailed) are in bold colour, non-significant correlations are in light colour. Points 1, 2, and 3 are Timber, NWC01/PRC01, and Jellybean Lake, respectively.

## **References**

Compo GP, Whitaker JS, Sardeshmukh PD et al. (2011) The Twentieth Century Reanalysis Project. *Q J Royal Meteorol Soc* 137: 1–28

Kalnay E, Kanamitsu M, Kistler R et al. (1996) The NCEP/NCAR 40-Year Reanalysis Project. *Bull Am Meteorol Soc* 77: 437–471

Uppala SM, Kållberg PW, Simmons AJ et al. (2005) The ERA-40 re-analysis. *Q J Royal Meteorol Soc* 131: 2961–3012
